# Supplementary material
Source: ML conference proceedings conference paper supplement (https://openreview.net/forum?id=yE1_GpmDOPL)

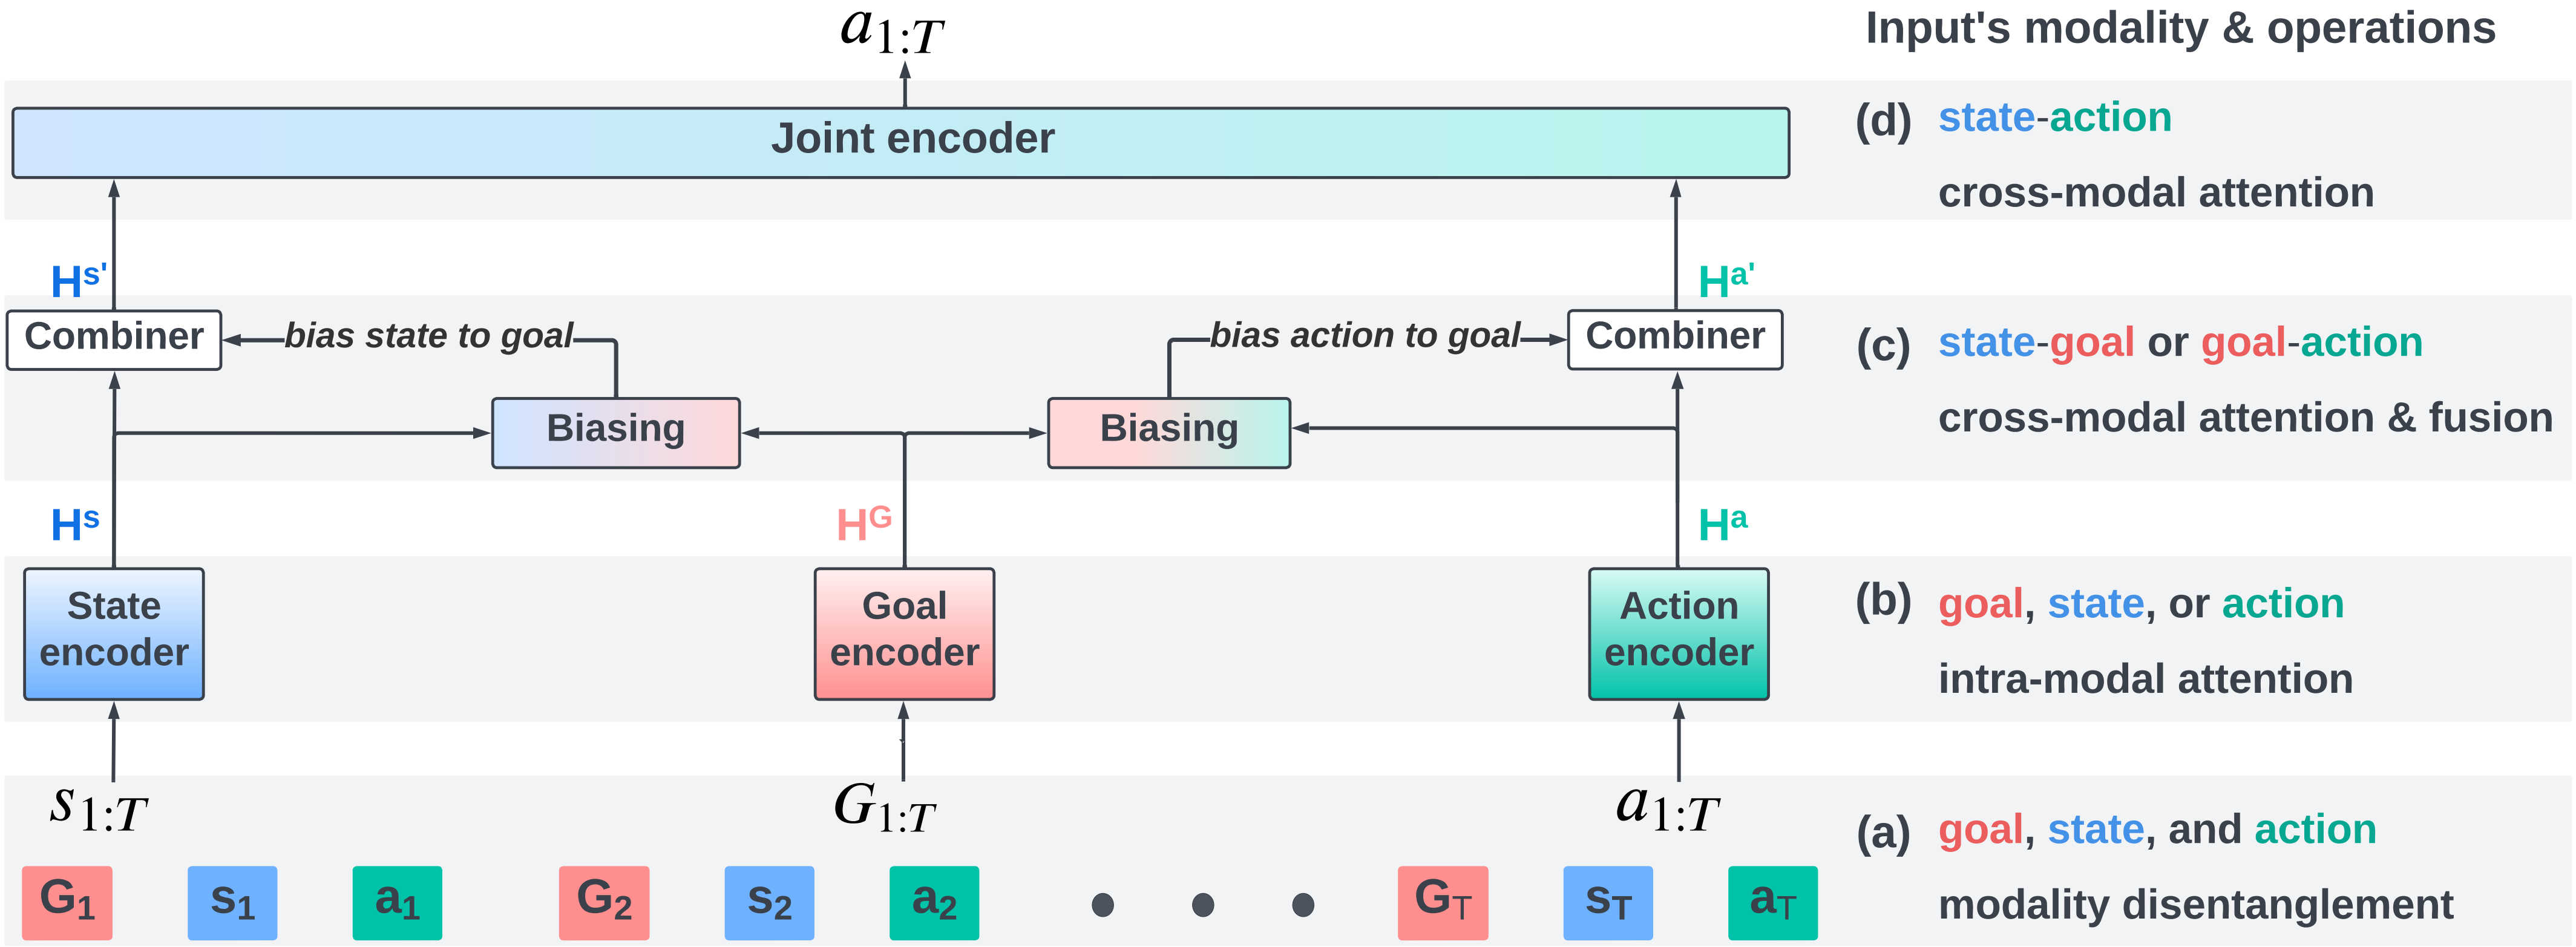

Supplement: supplementary_material [file attachment]

Return

4%

**Intra-modal** attentions

**Cross-modal** attentions

Action

17%

10%

State

20%

23%

26%

Return

Action

State

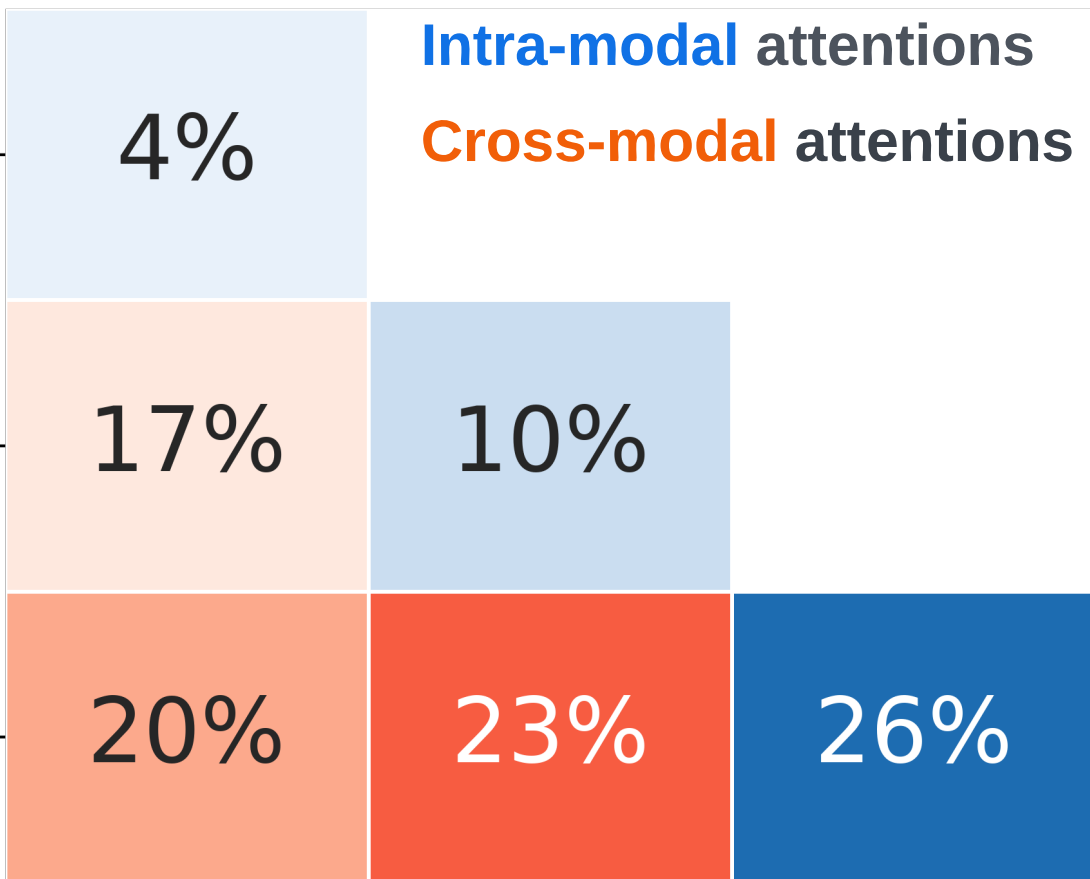

Supplement: supplementary_material [file attachment]
